# Supplementary material for: Solid–Solid Catalysis in Sustainable Alloy Synthesis
Source: Research Square preprint supplement (doi:10.21203/rs.3.rs-7986257/v1), 2025-11-11
Supplement: Supplementary file 1 [file 9a9ce68d44d454a003cd7f29.pdf]

1  
2  
3  
4  
5  
6  
7  
8  
9  
10  
11  
12  
13  
14  
15  
16  
17  
18  
19  
20  
21  
22  
23  
24

Supplementary Materials for

**Solid–Solid Catalysis in Sustainable Alloy Synthesis**

Xinren Chen, Baptiste Bienvenu, Tingting Yang, Baptiste Gault,  
Shaolou Wei\*, Xuyang Zhou\* and Dierk Raabe\*

**This PDF file includes:**  
Tables S1 and S2  
Figs. S1 to S7

## Supplementary Tables:

| $H_p$ (eV)                           | DFT GGA-PBE | DFT metaGGA-r <sup>2</sup> SCAN |
|--------------------------------------|-------------|---------------------------------|
| Ni / Fe                              | -0.23       | -0.79                           |
| Ni / Fe <sub>2</sub> O <sub>3</sub>  | +1.26       | +1.60                           |
| Ni / Fe <sub>3</sub> O <sub>4</sub>  | +0.56       | -0.12                           |
| Ni / FeO                             | +0.55       | -0.26                           |
| NiO / Fe                             | -0.36       | -0.40                           |
| NiO / Fe <sub>2</sub> O <sub>3</sub> | +1.15       | +1.99                           |
| NiO / Fe <sub>3</sub> O <sub>4</sub> | +0.42       | +0.27                           |
| NiO / FeO                            | +0.26       | +0.13                           |

**Table S1.** DFT-predicted partitioning enthalpies  $H_p$  between metallic Ni, Fe, and their respective oxides, namely NiO, Fe<sub>2</sub>O<sub>3</sub>, Fe<sub>3</sub>O<sub>4</sub> and FeO. Results of both DFT GGA-PBE and metaGGA-r<sup>2</sup>SCAN are indicated.

| $H_p$ (eV)          | DFT GGA-PBE | DFT metaGGA-r <sup>2</sup> SCAN |
|---------------------|-------------|---------------------------------|
| Bulk Ni/FeO         | +0.55       | -0.26                           |
| {111} <sub>Fe</sub> | +0.28       | +0.25                           |
| {111} <sub>O</sub>  | +0.19       | -0.21                           |

**Table S2.** DFT-predicted partitioning enthalpies  $H_p$  for the two bulk FCC Ni and FeO, as well as at the {111} interface between FCC Ni and FeO. Results of both DFT GGA-PBE and metaGGA-r<sup>2</sup>SCAN are indicated, for both the Fe and O-terminated configuration of the interface

# 35 **Supplementary Figures:**

36

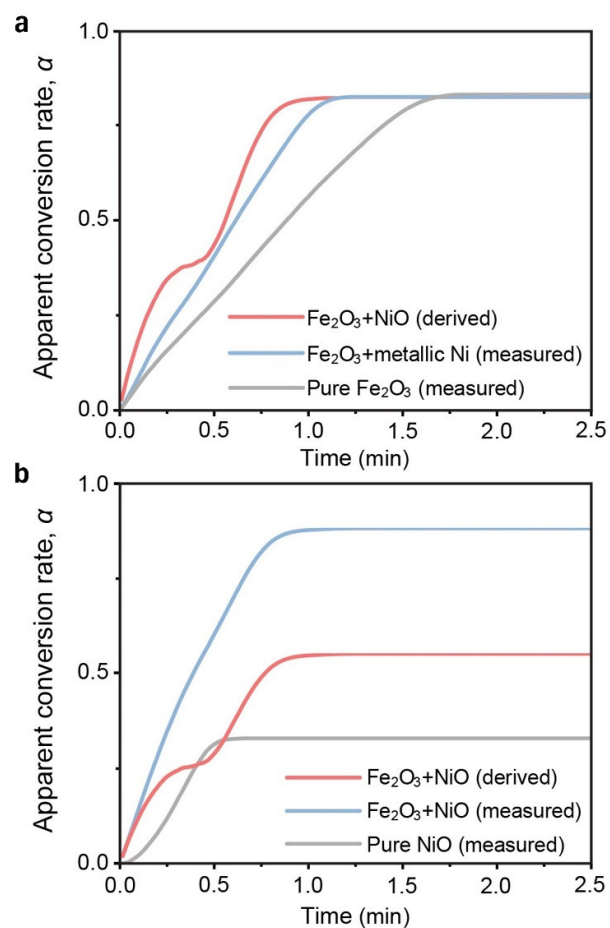

37

38 **Fig. S1. (a)** Measured reduction of pure NiO and  $\text{Fe}_2\text{O}_3 + \text{NiO}$  (Fe-36Ni wt.%) at 700 °C under a 10 L/h  $\text{H}_2$  flow,  
 39 together with the derived contribution of  $\text{Fe}_2\text{O}_3$  reduction obtained by subtracting the scaled portion of NiO  
 40 reduction from the  $\text{Fe}_2\text{O}_3 + \text{NiO}$  curve. **(b)** Comparison of measured reduction kinetics of pure  $\text{Fe}_2\text{O}_3$  and  $\text{Fe}_2\text{O}_3$   
 41 + metallic Ni (Fe-36 wt.% Ni) with the derived contribution of  $\text{Fe}_2\text{O}_3$  reduction for  $\text{Fe}_2\text{O}_3 + \text{NiO}$  (Fe-36Ni wt.%),  
 42 where the influence of NiO reduction is subtracted, serving as the reference for Fig. 1b.

43

44

45

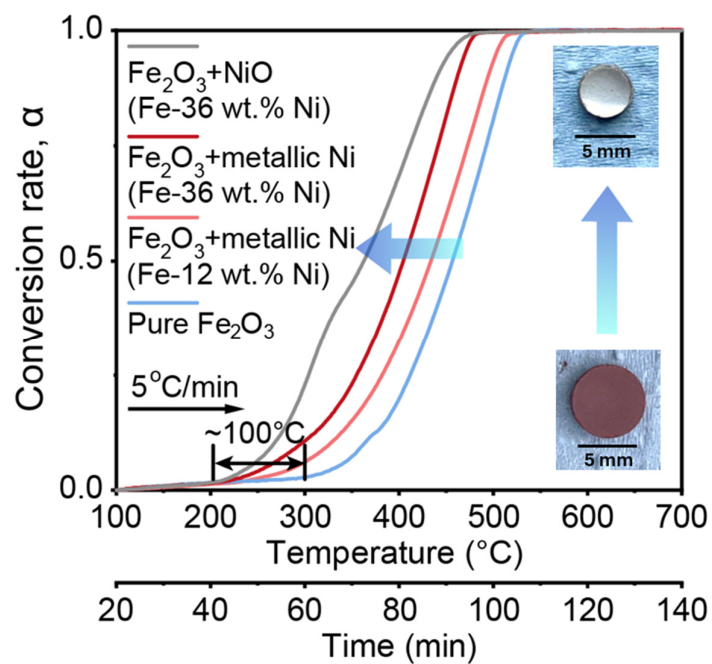

46

47

**Fig. S2.** Conversion curves of  $\text{Fe}_2\text{O}_3$  reduction (bulk sample) during continuous heating to  $700^{\circ}\text{C}$  under 10 L/h  $\text{H}_2$  flow: Ni and NiO addition lowers the reduction temperature and accelerates the reaction. Insets show the morphology of the samples before and after reduction.

51

52

53

54

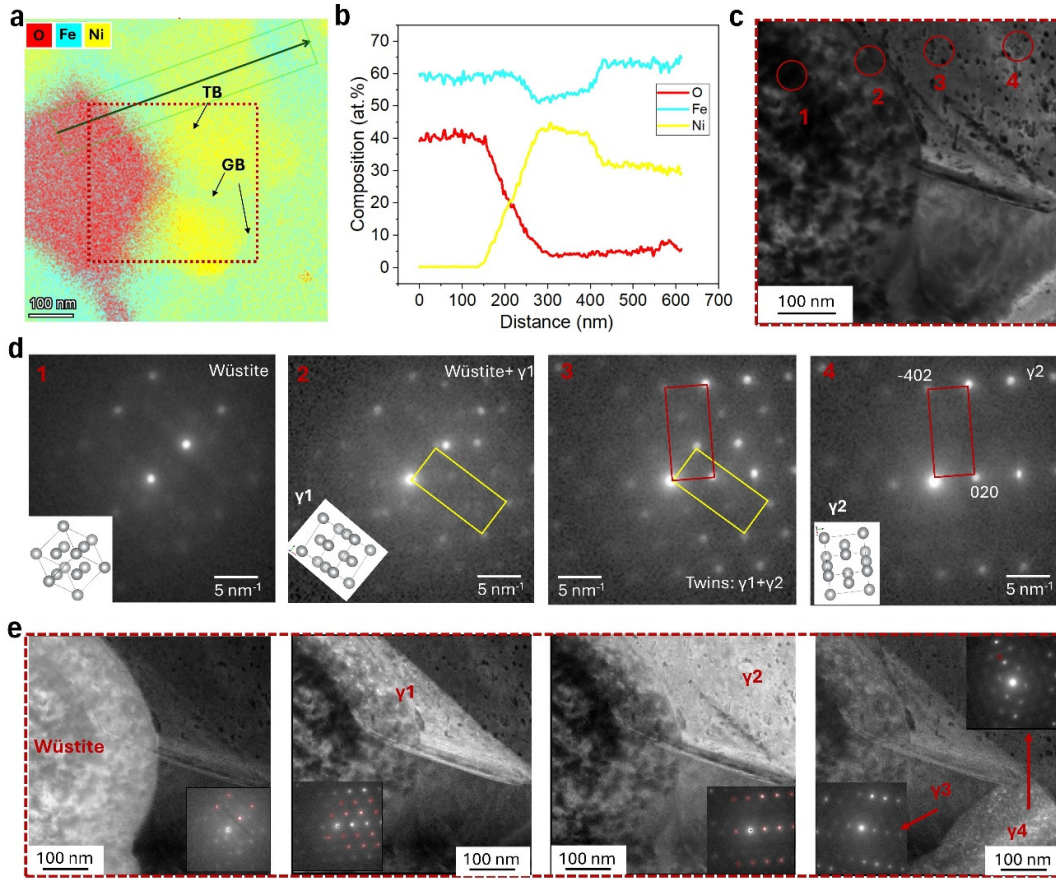

**Fig. S3.** (a) EDS map of Fig. 2e, highlighting elemental distributions of oxygen (O, red), iron (Fe, blue), and nickel (Ni, yellow). Twin boundaries (TB) and grain boundaries (GB) within the Fe–Ni FCC are indicated by arrows. (b) EDS line profile taken from (a), showing a compositional transition at the  $\text{Fe}_{1-x}\text{O}/\text{FCC}$  interface. (c) Magnified virtual bright-field 4D-STEM image of the region outlined in Fig. 3a, with four indicated positions (1–4) selected for selected area electron diffraction (SAED) analysis. (d) SAED patterns from positions 1–4 in (c), confirming (1)  $\text{Fe}_{1-x}\text{O}$ , (2) a mixed  $\text{Fe}_{1-x}\text{O}$ –FCC diffraction pattern, (3) twinned FCC reflections ( $\gamma_1+\gamma_2$ ), and (4) the FCC grain orientation ( $\gamma_2$ ). (e) Virtual dark-field images of  $\text{Fe}_{1-x}\text{O}$  (left) and four differently oriented FCC Fe–Ni grains ( $\gamma_1$ ,  $\gamma_2$ ,  $\gamma_3$ , and  $\gamma_4$ ), each with its corresponding SAED pattern. Insets include virtual apertures (red circles) for selected spots.

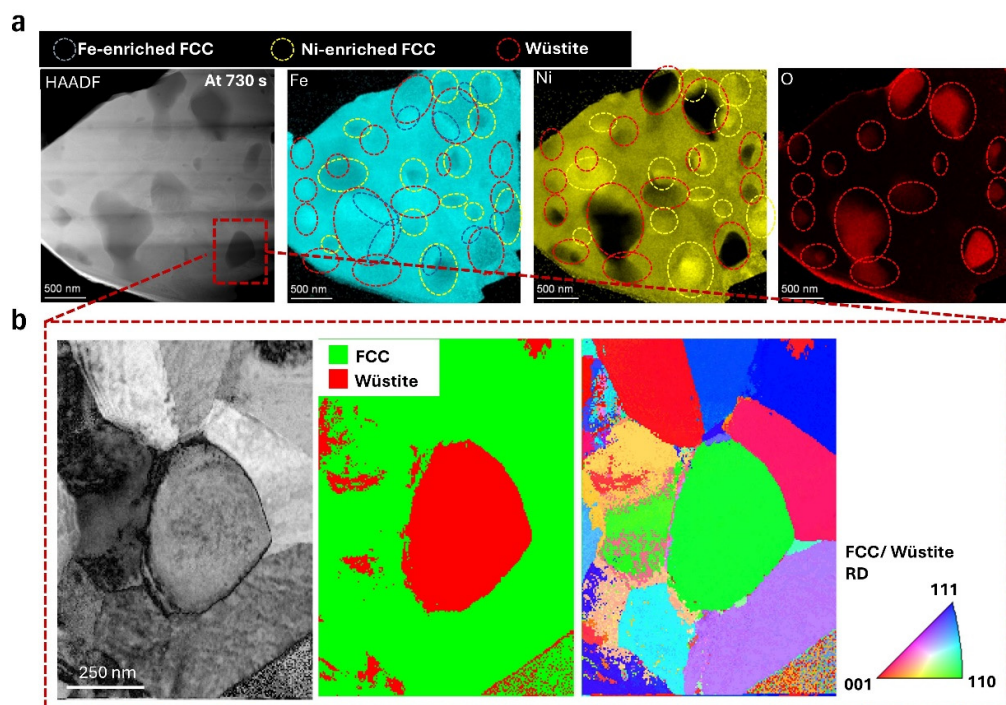

69

70 **Fig. S4.** (a) HAADF-STEM overview image examined after 730 s of hydrogen reduction of Fe<sub>2</sub>O<sub>3</sub>+ NiO (Fe–  
 71 36Ni wt.%) at 700°C under a 0.6 L/h H<sub>2</sub> flow and the corresponding EDS maps of Fe (cyan), Ni (yellow), and O  
 72 (red). Areas enriched in Fe-bearing FCC (blue outlines), Ni-bearing FCC (yellow outlines), and Fe<sub>1-x</sub>O (red  
 73 outlines) are highlighted. (b) 4D-STEM results for the magnified view of the region marked in (a), showing a  
 74 virtual bright-field TEM image (left), a phase map distinguishing FCC (green) from Fe<sub>1-x</sub>O (red) (middle), and an  
 75 orientation map of FCC and Fe<sub>1-x</sub>O grains (right).

76

77

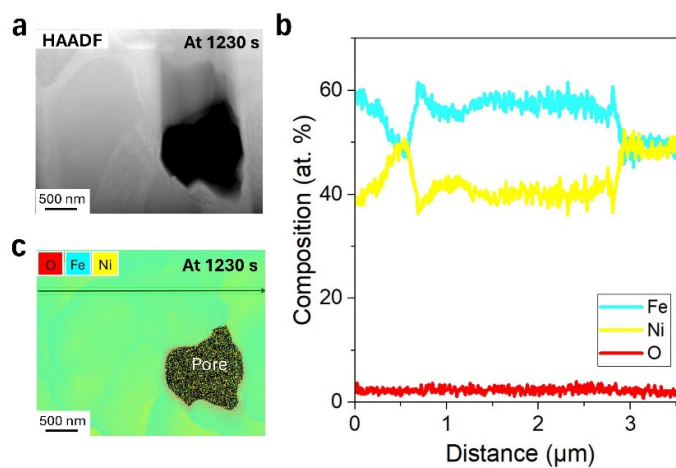

78

79 **Fig. S5.** (a) High-angle annular dark-field scanning transmission electron microscopy (HAADF-STEM) image  
 80 at 1230 s of hydrogen reduction of  $\text{Fe}_2\text{O}_3 + \text{NiO}$  (Fe-36Ni wt.%) at 700°C under a 0.6 L/h  $\text{H}_2$  flow showing the  
 81 porous structure of the resulting alloy. (b) Corresponding energy-dispersive X-ray spectroscopy (EDS) elemental  
 82 map confirming uniform Fe and Ni distribution within the porous region. (c) Line profile of elemental composition  
 83 across the sample at 1230 s showing homogeneous Fe and Ni distribution, with a negligible oxygen content.

84

85



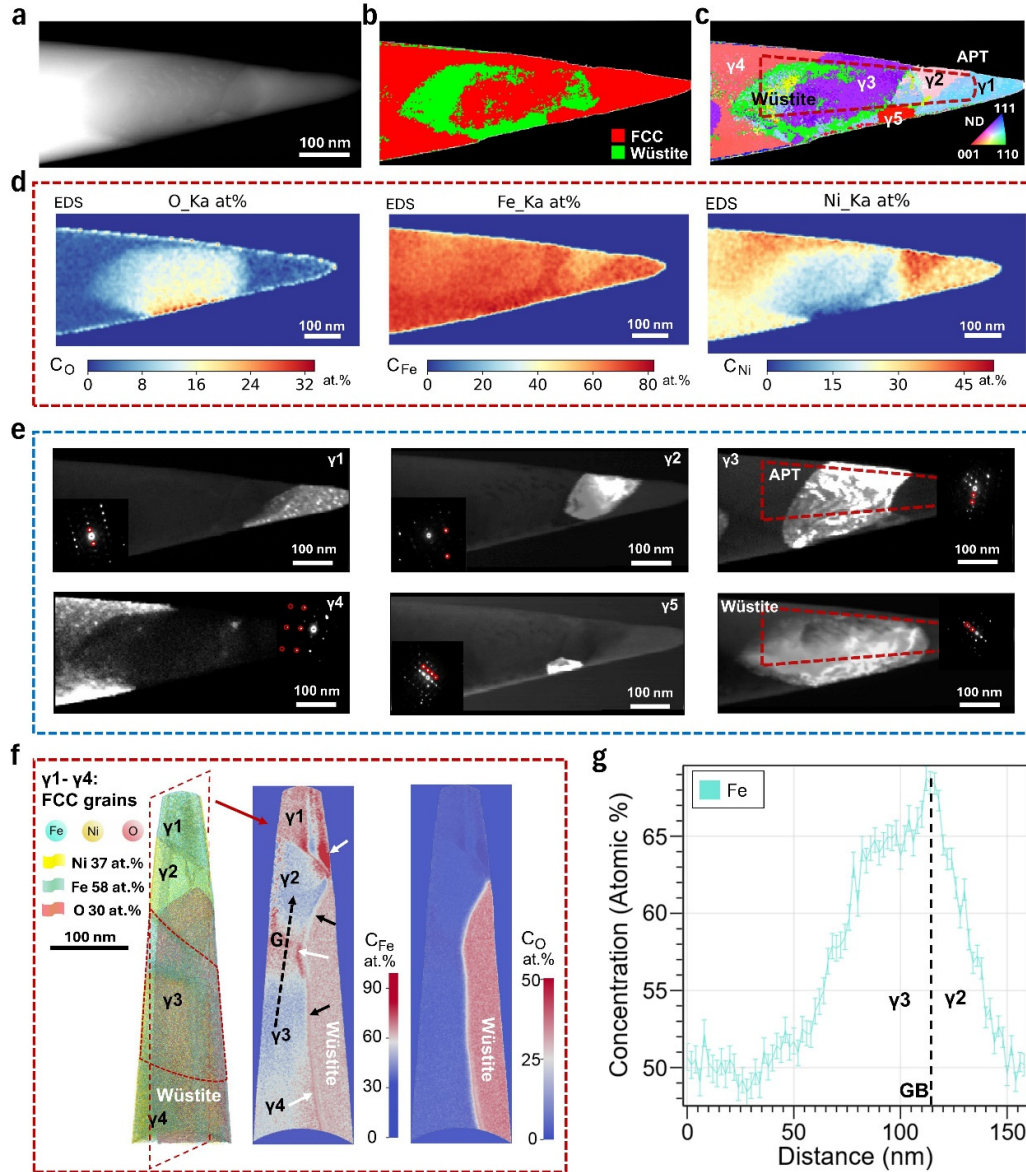

86

87 **Fig. S6.** (a) HAADF-STEM image of an APT needle acquired at 730 s of hydrogen reduction of  $\text{Fe}_2\text{O}_3 + \text{NiO}$  (Fe–  
88 36Ni wt.%) at 700°C under a 0.6 L/h  $\text{H}_2$  flow, prepared to capture the  $\text{Fe}_{1-x}\text{O}$ –FCC interface. (b) Phase map of the  
89 same needle, showing  $\text{Fe}_{1-x}\text{O}$  (green) embedded within the FCC Fe–Ni matrix (red). (c) Crystallographic  
90 orientation map (inverse pole figure) indicating multiple FCC grains ( $\gamma_1$ – $\gamma_5$ ) adjacent to the  $\text{Fe}_{1-x}\text{O}$  region. (d)  
91 EDS elemental maps of the needle tip showing distributions of O (left), Fe (middle), and Ni (right). (e) Virtual  
92 dark-field STEM images of  $\text{Fe}_{1-x}\text{O}$  and FCC grains ( $\gamma_1$ – $\gamma_5$ ), with selected area diffraction patterns (insets)  
93 confirming the phase identity. (f) 3D reconstruction of the APT dataset showing Ni (~37 at.%), Fe (~58 at.%), and  
94 residual O (~30 at.%) concentrations. The left panel identifies FCC grains  $\gamma_1$ – $\gamma_4$  adjacent to  $\text{Fe}_{1-x}\text{O}$ . Middle and  
95 right panels show elemental distributions of Fe and O of the slice (the red dashed box in the left panel). The white  
96 arrows show the enrichment of Fe. (g) One-dimensional Fe concentration profile across the  $\gamma_3$ – $\gamma_2$  interface, taken  
97 along the dashed arrow in (f), showing compositional variation across the grain boundary.



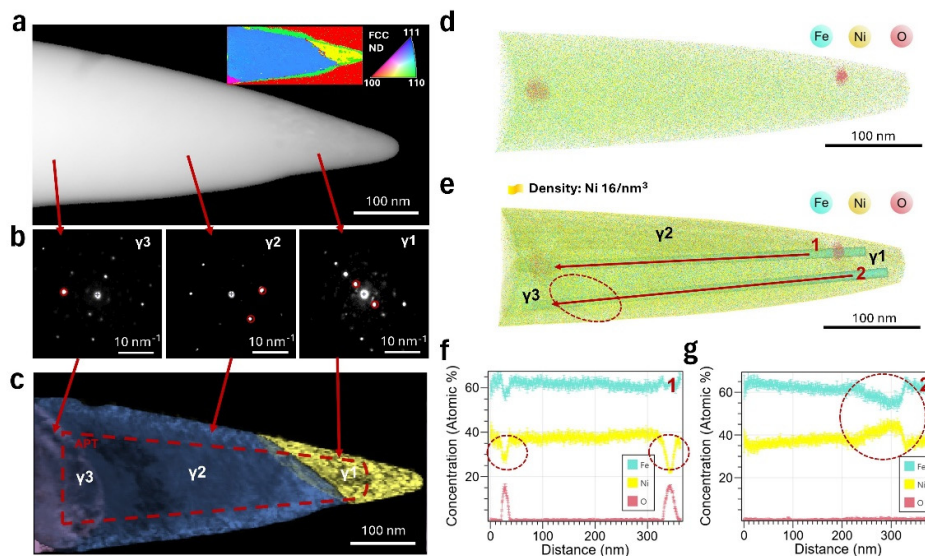

98

99 **Fig. S7.** (a) HAADF-STEM image of the APT tip from a region where oxides were nearly fully reduced at 730 s  
 100 of hydrogen reduction of  $\text{Fe}_2\text{O}_3 + \text{NiO}$  (Fe–36Ni wt.%) at 700°C under a 0.6 L/h  $\text{H}_2$  flow. The inset shows an  
 101 inverse pole figure map (color-coded by crystal direction) overlaid on the tip apex, obtained by indexing the 4D-  
 102 STEM dataset, confirming that the tip contains multiple FCC grains ( $\gamma_1$ ,  $\gamma_2$ , and  $\gamma_3$ ). (b) Corresponding 4D-STEM  
 103 electron diffraction patterns from the three  $\gamma$  grains, with key reflections circled to produce virtual dark-field  
 104 images. (c) Overlay of these virtual dark-field images for each FCC grain and orientation, highlighting the spatial  
 105 arrangement of  $\gamma_1$  (yellow),  $\gamma_2$  (blue), and  $\gamma_3$  (purple). The dashed red box outlines the region subsequently  
 106 analyzed by APT. (d) Reconstructed APT point cloud, showing the distributions of Fe (cyan), Ni (yellow), and O  
 107 (pink). Two oxide-rich zones (red) are evident within the matrix. (e) The same dataset, now with a semitransparent  
 108 Ni isodensity surface ( $16 \text{ nm}^{-3}$ ), to reveal potential grain boundaries. Labels “1” and “2” mark the paths along  
 109 which 1D composition profiles were extracted. (f, g) Composition profiles taken along paths 1 and 2, respectively,  
 110 in (e). Path 1 shows Ni-depleted zones (circled in red) near oxide pockets; the O concentration rises as Ni decreases,  
 111 indicating residual oxide locations. Path 2 reveals the remaining precursor high-Ni region (circled in red). APT  
 112 results (fig. S7) reveal the presence of fine residual  $\text{Fe}_{1-x}\text{O}$  at the  $\gamma_1/\gamma_2$  and  $\gamma_2/\gamma_3$  grain boundaries, as highlighted  
 113 by the Ni density isosurface in fig. S7e, which illustrates the growth of FCC (Fe, Ni) grains through the  
 114 consumption of  $\text{Fe}_{1-x}\text{O}$ . In fig. S7f, a thin Fe-enriched layer near the oxide interface indicates an ongoing reaction.  
 115 In the closed area, these oxide remnants are expected to undergo further reduction in later rate-limiting stages  
 116 through diffusion of O. The reduction of residual oxides proceeds slowly—leading to additional hydrogen  
 117 consumption and higher energy requirements to sustain reaction temperatures. A comparison of figs. S7e and S7g  
 118 shows that, even within the same  $\gamma_2$  grain, a region near the  $\gamma_2/\gamma_3/\text{Fe}_{1-x}\text{O}$  triple junction exhibits elevated Ni levels,  
 119 implying that Fe diffusion toward the  $\gamma_2$  precursor portion is slower than direct Fe precipitation and alloying in  
 120 other parts of the  $\gamma_2$  grain.
